# Supplementary material for: Chiral selectivity in lithium niobate crystals: investigating the role of l - and d -alanine as chiral inducers
Source: Royal Society of Chemistry journal article supplement (doi:10.1039/d5ce00522a), 2025-01-01
Supplement: d5ce00522a1.pdf [file d5ce00522a1.pdf]

## Supporting Information

### Chiral Selectivity in Lithium Niobate Crystals: Investigating the Role of L- and D-Alanine as Chiral Inducers

Matan Oliel,<sup>\*a</sup> and Yitzhak Mastai<sup>b</sup>

Department of Chemistry and Institute of Nanotechnology, Bar-Ilan University, Ramat-Gan 5290002, Israel

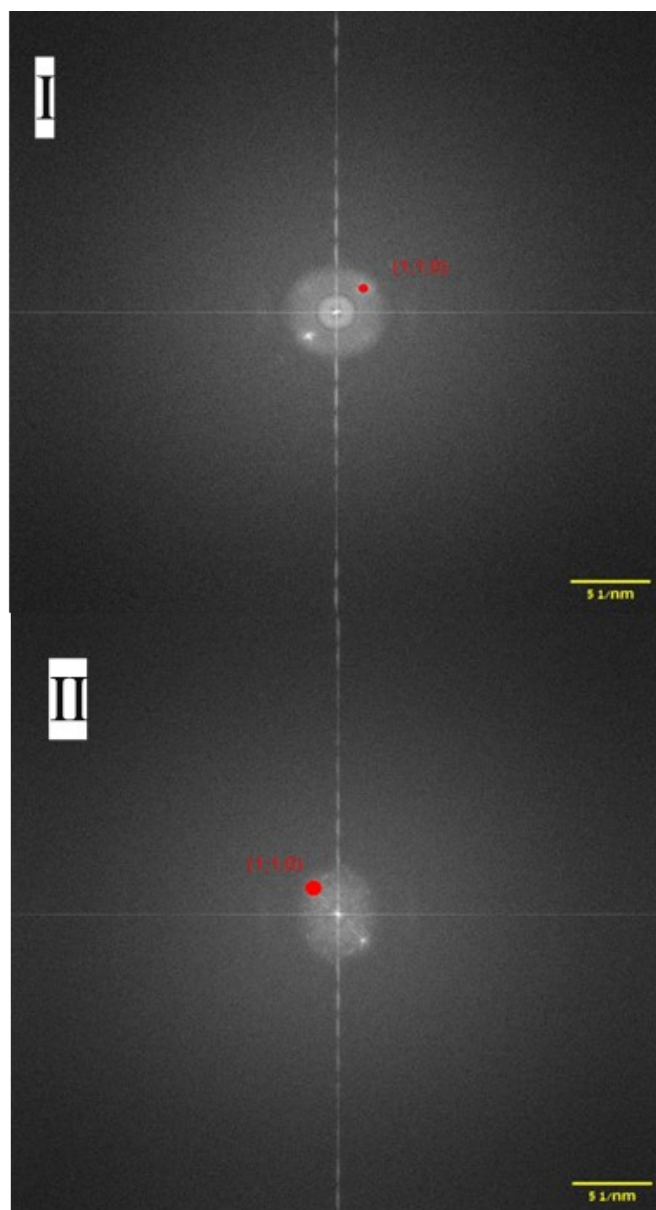

S1: SAED images from L/D-Ala-induced LiNbO<sub>3</sub> single crystals (I/II): diffraction spots from (1, 1, 0) plane (d-spacing 0.257/0.258 nm).



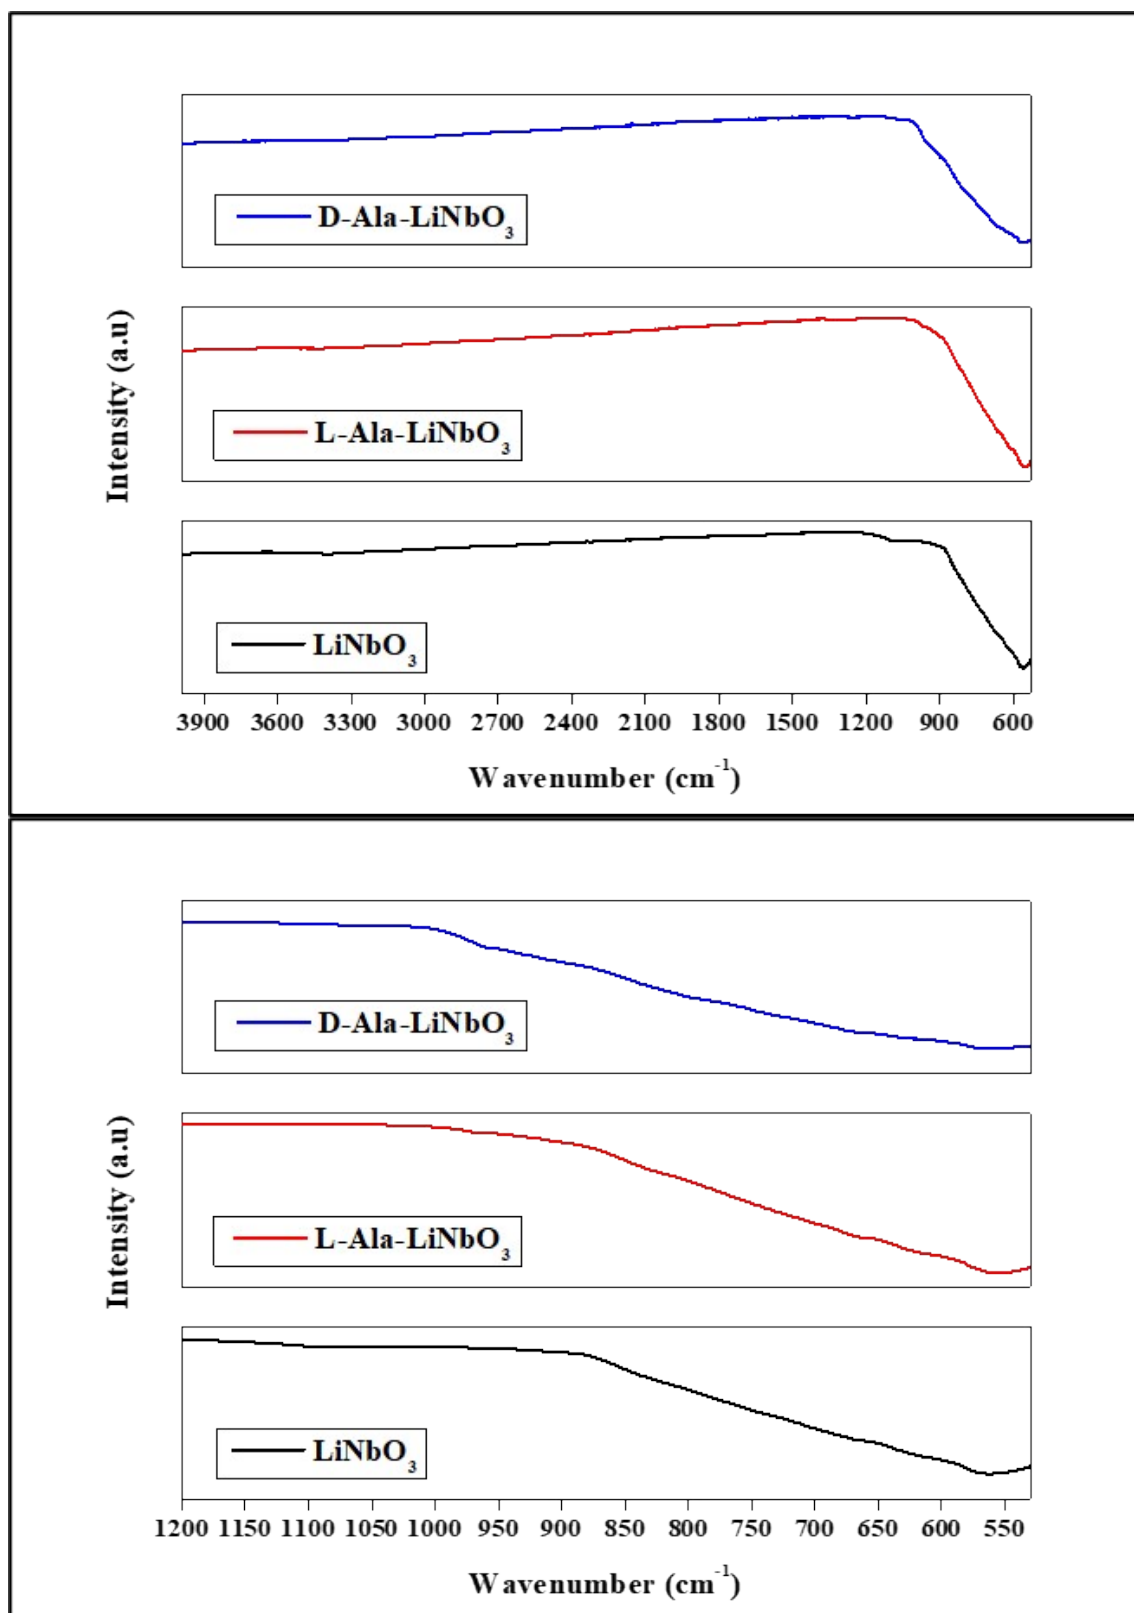

S2: FTIR spectra of control and chiral-induced LiNbO<sub>3</sub> crystals (upper); close-up view of Nb-O vibration band at 562 cm<sup>-1</sup> (bottom).



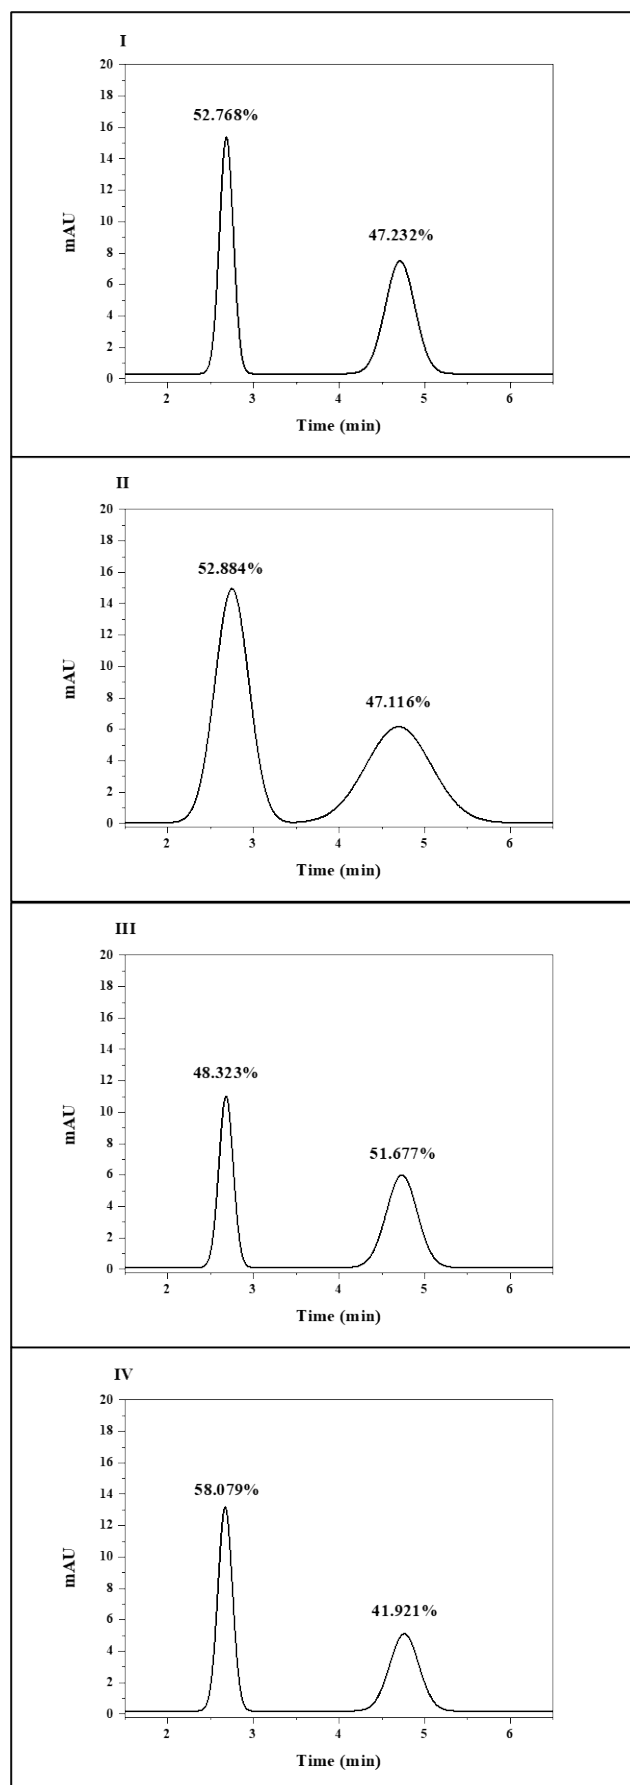

S3: HPLC chromatograms of DL-Ala (5 mg/mL) before (I) and after adsorption to un-induced LiNbO<sub>3</sub> (II), L-Ala-induced LiNbO<sub>3</sub> (III) and D-Ala-induced LiNbO<sub>3</sub> (IV).



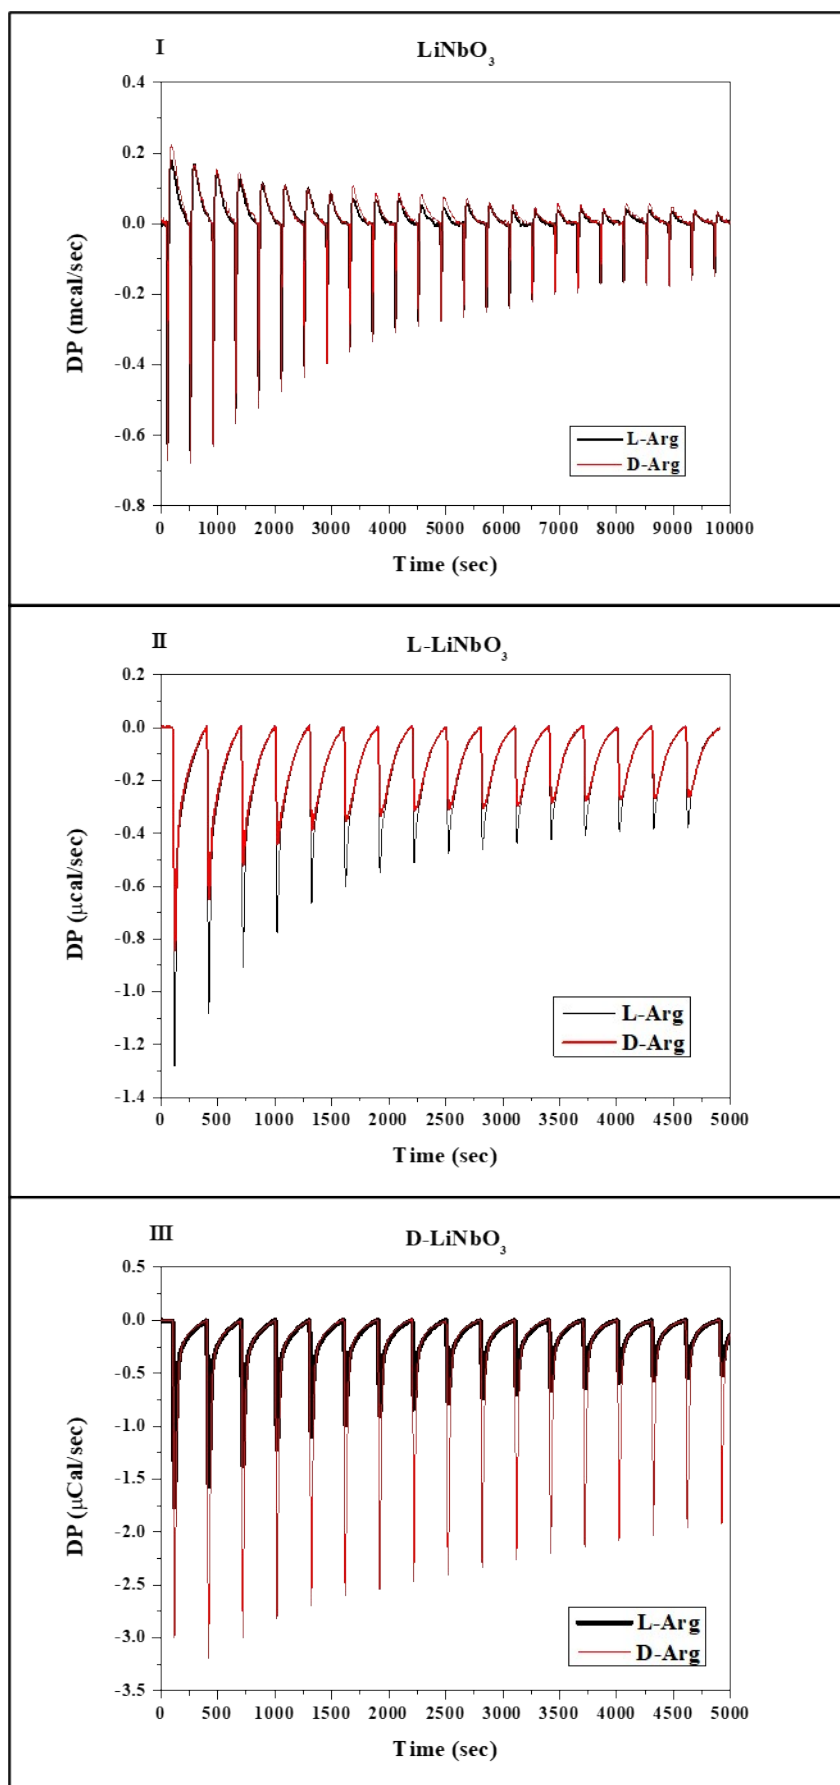

S4: ITC profiles at 30 °C by titrating 5 mM L/D-Arg (black/red) into 10 mg/mL un-induced  $\text{LiNbO}_3$  (I), L-Ala-induced  $\text{LiNbO}_3$  (II) and D-Ala-induced  $\text{LiNbO}_3$  (III).
